# Supplementary material for: Calligraphic ink enabling washable conductive textile electrodes for supercapacitors
Source: Royal Society of Chemistry journal article supplement (doi:10.1039/c6ta01341d), 2016-01-01
Supplement: c6ta01341d1.pdf [file c6ta01341d1.pdf]

## Supporting information

### Calligraphic Ink Enabling Washable Conductive Textile Electrodes for Supercapacitors

Do Van Lam,<sup>ab</sup> Kyungmin Jo,<sup>a</sup> Chang-Hyun Kim,<sup>a</sup> Sejeong Won,<sup>a</sup> Yun Hwangbo,<sup>a</sup> Jae-Hyun Kim,<sup>ab</sup> Hak-Joo Lee,<sup>ab</sup> and Seung-Mo Lee<sup>\*ab</sup>

<sup>a</sup> Department of Nanomechanics, Korea Institute of Machinery and Materials (KIMM), 156 Gajeongbuk-ro, Yuseong-gu, Daejeon 34113, South Korea

<sup>b</sup> Nano Mechatronics, Korea University of Science and Technology (UST), 217 Gajeong-ro, Yuseong-gu, Daejeon 34103, South Korea

\* Corresponding author: Seung-Mo Lee

*Email address:* sm.lee@kimm.re.kr

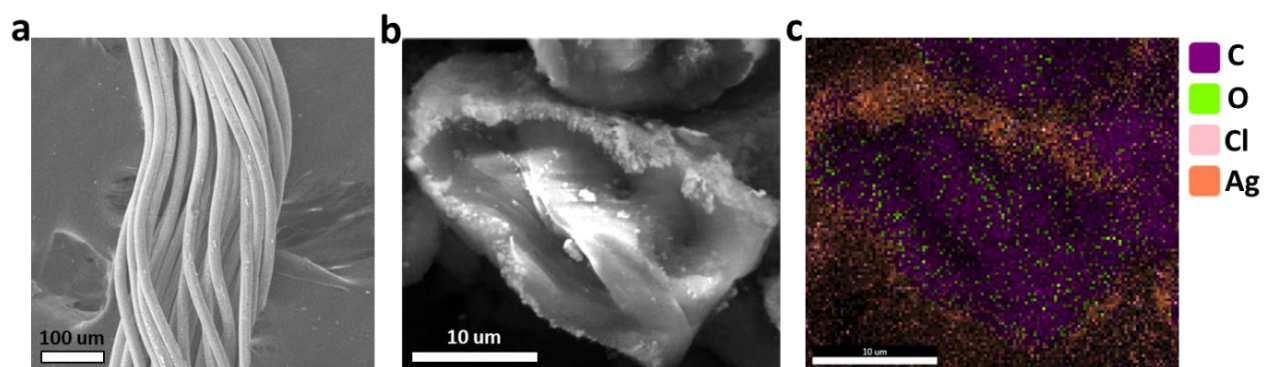

**Figure S1.** (a) SEM image of a bundle of silver blend fibers. (b) SEM cross-section image of a silver blend fiber at higher magnification. (c) The corresponding EDX elemental distribution in (b).

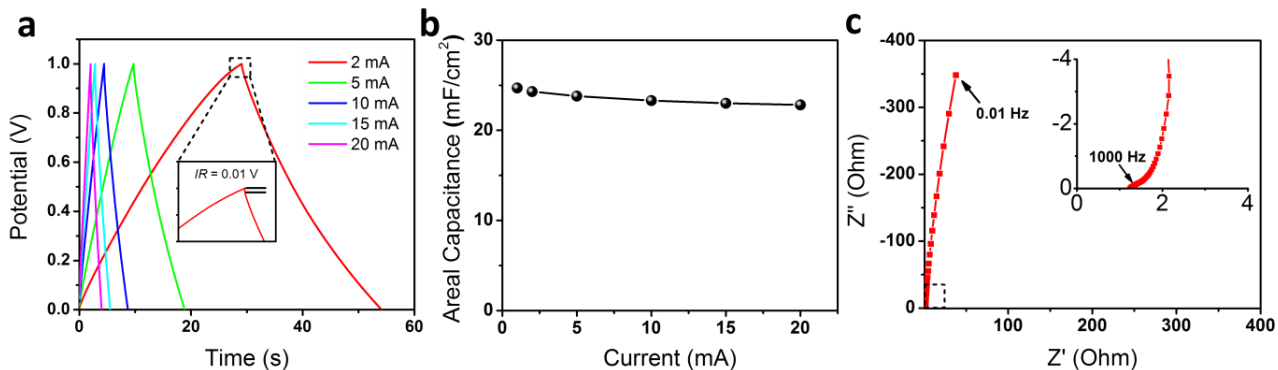

**Figure S2.** (a) Galvanostatic charge/discharge curves of gel supercapacitor device at different loading currents. (b) Capacitance calculated based on galvanostatic charge/discharge curves. (c) Nyquist plot of the supercapacitor at open circuit potential. The inset shows the magnified high-frequency regions of the Nyquist curve.

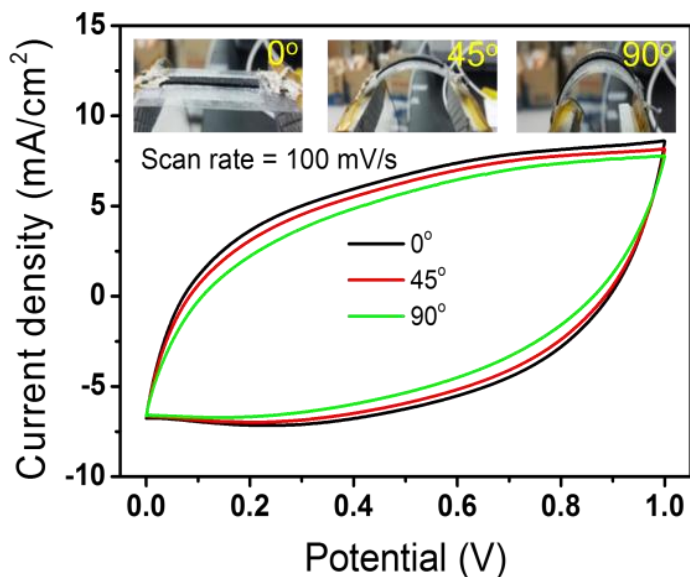

**Figure S3.** The cyclic voltammety curves of the solid-state supercapacitors collected at the scan rate of 100 mV/s with different bending angles. The inset is photographs of the supercapacitors under different bending angles.
